Methods paper template

# 1 PlasmidTron: assembling the cause of phenotypes 2 from NGS data

3 Andrew J. Page\*, Alexander Wailan, Yan Shao, Kim Judge, Gordon Dougan, Elizabeth J. Klemm,  
4 Nicholas R. Thomson, Jacqueline A. Keane

5  
6 Infection Genomics, Wellcome Trust Sanger Institute, Wellcome Genome Campus, Hinxton,  
7 Cambridge, UK.

8 \*Corresponding author: [ap13@sanger.ac.uk](mailto:ap13@sanger.ac.uk)

---

## 9 10 ABSTRACT

11 When defining bacterial populations through whole genome sequencing (WGS) the samples often  
12 have detailed associated metadata that relate to disease severity, antimicrobial resistance, or even  
13 rare biochemical traits. When comparing these bacterial populations, it is apparent that some of  
14 these phenotypes do not follow the phylogeny of the host i.e. they are genetically unlinked to the  
15 evolutionary history of the host bacterium. One possible explanation for this phenomenon is that  
16 the genes are moving independently between hosts and are likely associated with mobile genetic  
17 elements (MGE). However, identifying the element that is associated with these traits can be  
18 complex if the starting point is short read WGS data. With the increased use of next generation WGS  
19 in routine diagnostics, surveillance and epidemiology a vast amount of short read data is available  
20 and these types of associations are relatively unexplored. One way to address this would be to  
21 perform assembly *de novo* of the whole genome read data, including its MGEs. However, MGEs are  
22 often full of repeats and can lead to fragmented consensus sequences. Deciding which sequence is  
23 part of the chromosome, and which is part of a MGE can be ambiguous. We present *PlasmidTron*,  
24 which utilises the phenotypic data normally available in bacterial population studies, such as  
25 antibiograms, virulence factors, or geographic information, to identify sequences that are likely to  
26 represent MGEs linked to the phenotype. Given a set of reads, categorised into cases (showing the  
27 phenotype) and controls (phylogenetically related but phenotypically negative), *PlasmidTron* can be  
28 used to assemble *de novo* reads from each sample linked by a phenotype. A *k*-mer based analysis is  
29 performed to identify reads associated with a phylogenetically unlinked phenotype. These reads are  
30 then assembled *de novo* to produce contigs. By utilising *k*-mers and only assembling a fraction of the  
31 raw reads, the method is fast and scalable to large datasets. This approach has been tested on  
32 plasmids, because of their contribution to important pathogen associated traits, such as AMR, hence  
33 the name, but there is no reason why this approach cannot be utilized for any MGE that can move

34 independently through a bacterial population. *PlasmidTron* is written in Python 3 and available  
35 under the open source licence GNU GPL3 from <https://goo.gl/ot6rT5> .

36

37

---

## 38 DATA SUMMARY

39

40 1. Source code for *PlasmidTron* is available from Github under the open source licence GNU  
41 GPL3; (url – <https://goo.gl/ot6rT5> )

42

43 2. Simulated raw reads files have been deposited in Figshare; (url –  
44 <https://doi.org/10.6084/m9.figshare.5406355.v1> )

45

46 3. *Salmonella enterica* serovar Weltevreden strain VNS10259 is available from GenBank;  
47 accession number GCA\_001409135.

48

49 4. *Salmonella enterica* serovar Typhi strain BL60006 is available from GenBank; accession  
50 number GCA\_900185485.

51

52 5. Accession numbers for all of the Illumina datasets used in this paper are listed in the  
53 supplementary tables.

54

55 **I/We confirm all supporting data, code and protocols have been provided within the article or**  
56 **through supplementary data files. ☒**

57

---

## 58 IMPACT STATEMENT

59

60 *PlasmidTron* utilises the phenotypic data normally available in bacterial population studies, such as  
61 antibiograms, virulence factors, or geographic information, to identify sequences that are likely to  
62 represent MGEs linked to the phenotype.

63

---

## 64 INTRODUCTION

65 When defining bacterial populations through whole genome sequencing (WGS) the samples often  
66 have detailed associated metadata that relate to disease severity, antimicrobial resistance, or even  
67 rare biochemical traits. When comparing these bacterial populations, it is apparent that some of  
68 these phenotypes do not follow the phylogeny of the host i.e. they are genetically unlinked to the  
69 evolutionary history of the host bacterium. One possible explanation for this phenomenon is that  
70 the genes are moving independently between hosts and are likely associated with mobile genetic  
71 elements (MGE). However, identifying the element that is associated with these traits can be  
72 complex if the starting point is short read WGS data. With the increased use of next generation WGS  
73 in routine diagnostics, surveillance and epidemiology a vast amount of short read data is available  
74 and these types of associations are relatively unexplored. One way to address this would be to  
75 perform assembly *de novo* of the whole genome read data, including its MGEs. However, MGEs are  
76 often full of repeats and can lead to fragmented consensus sequences. Deciding which sequence is  
77 part of the chromosome, and which is part of a MGE can be ambiguous (1).

78 A number of recent methods have been developed to address the problem of assembling some of  
79 these MGEs, from NGS data (1). *plasmidSPAdes* (2) detects plasmids by analysing the coverage of  
80 assembled contigs to separate out chromosomes from plasmid like sequences. By filtering the  
81 dataset, a higher quality assembly is possible. However, if the copy number of the plasmids are  
82 similar to the chromosome, it is not possible to separate out plasmids. *Unicycler* (3) is a hybrid  
83 assembler which can combine short and long read data to produce fully circularised chromosomes  
84 and plasmids. It essentially fixes many of the deficiencies of *SPAdes* (4) and fine tunes it for  
85 assembling bacteria. *Recycler* (5) takes an assembly graph and aligned reads to search for cycles in  
86 the graph which may correspond to plasmids. The method is only partially implemented with  
87 substantial work required on the researcher's part to generate input files in the correct formats. It is  
88 shown to work well on small simple plasmids, however it does not scale to larger more complex  
89 plasmids. All of these software applications utilise *SPAdes* within their methods, work on a single  
90 sample at a time, and require no *a priori* knowledge about the samples themselves.

91 We present *PlasmidTron*, which utilises the phenotypic data normally available in bacterial  
92 population studies, such as antibiograms, virulence factors, or geographic information, to identify  
93 sequences that are likely to represent MGEs linked to the phenotype. Given a set of reads,  
94 categorised into cases (showing the phenotype) and controls (phylogenetically related but  
95 phenotypically negative), *PlasmidTron* can be used to assemble *de novo* reads from each sample  
96 linked by a phenotype. A *k*-mer based analysis is performed to identify reads associated with a  
97 phylogenetically unlinked phenotype. These reads are then assembled *de novo* to produce contigs.  
98 By utilising *k*-mers and only assembling a fraction of the raw reads, the method is fast and scalable  
99 to large datasets. This approach has been tested on plasmids, because of their contribution to  
100 important pathogen associated traits, such as AMR, hence the name, but there is no reason why this  
101 approach cannot be utilized for any MGE that can move independently through a bacterial  
102 population. The method is tested on simulated and real datasets, compared to other methods, and  
103 the results are validated with long read sequencing. *PlasmidTron* is a command-line tool, is written  
104 in Python 3 and is available under the open source licence GNU GPL3 from <https://goo.gl/ot6rT5> .

105

106

---

## 107 METHOD

108 *PlasmidTron* takes two spreadsheets as input, one containing paired ended reads in FASTQ format  
109 for samples displaying the phenotype (cases), the other containing FASTA or FASTQ files for samples  
110 not displaying the phenotype (controls). The full method is shown in Figure 1. A *k*-mer analysis of  
111 each of the samples is performed using KMC (syntax versions v2.3.0 or v3.0.0) (6,7) to produce  
112 databases of *k*-mer counts. *k*-mers occurring less than 5 times are excluded by default since  
113 assembly is more error prone below this level of coverage. A union is taken of the cases *k*-mer  
114 databases to produce a new database of all *k*-mers ever seen in any of the trait samples, and  
115 similarly for the controls. The two sets are then subtracted from each other, leaving only *k*-mers  
116 uniquely present in the cases dataset. The raw reads, plus their mates, which match these unique *k*-  
117 mers are extracted from each sample where each read must be covered by a defined percentage of  
118 *k*-mers. Each set of reads is assembled *de novo* with SPAdes. The assembly contigs are filtered to  
119 remove small contigs (default 300 bases), and low coverage contigs (below 10X). This is because a  
120 single erroneous *k*-mer can draw in reads on either side equating to approximately the fragment size  
121 of the library. The resulting sequences can be fragmented so a second scaffolding step is  
122 undertaken. A *k*-mer database is generated for each assembly and the raw reads, plus their mates,  
123 are extracted for a second assembly with SPAdes. This allows for gaps of up to twice the fragment  
124 size to be closed. A final filtering step of the assembled sequences is performed, as previously  
125 described. An assembly in FASTA format is created for each of the trait samples, along with a plot of  
126 the shared *k*-mers in each sample, indicating the level of identity between samples. Parallelisation  
127 support is provided by GNU parallel (8).

128

## 129 RESULTS

130 To evaluate the effectiveness of *PlasmidTron* three datasets were used including: 1) simulated reads  
131 to show the impact of copy number variation in identifying plasmids, 2) the effectiveness of different  
132 methods in recalling plasmid type sequences on real world data, and 3) identification of a novel AMR  
133 plasmid with subsequent validation using long read sequencing. All experiments were performed  
134 using the Wellcome Trust Sanger Institute compute infrastructure, running Ubuntu 12.04.

135

### 136 IMPACT OF COPY NUMBER VARIATION

137 Simulated reads were generated to show the impact of copy number variation compared to other  
138 methods. A trivial set of simulated perfect reads was generated. A reference genome, which was  
139 sequenced using the PacBio RSII for *Salmonella enterica* serovar Weltevreden (*S. Weltevreden*)  
140 (accession number GCA\_001409135), was shredded using FASTAQ (v3.15.0)  
141 (<https://github.com/sanger-pathogens/fastaq>) to generate perfect paired-ended reads with a read  
142 length of 125 bases and a mean fragment size of 400 bases. The reference contains a single  
143 chromosome (5,062,936 bases) and single plasmid (98,756 bases), where the chromosome depth of  
144 coverage was fixed at 30X, and the plasmid depth of coverage was varied from 1 to 60X in steps of 2.  
145 The break point for the plasmid was varied, in steps of 500 bases, to simulate a circular genome.

146

147 The results of *PlasmidTron* (v0.3.5) were compared to 4 other methods, *recycler* (v0.6), *Unicycler*  
148 (v0.4.0), *SPAdes* (v3.10.0), and *plasmidSPAdes* (v3.10.0). *SPAdes* (v3.10.0) was used as the assembler  
149 for each of these methods. *recycler* required pre-processing steps using *bwa* (v0.7.12) (9) and  
150 *samtools* (v0.1.19) (10). *SPAdes* and *Unicycler* are not dedicated plasmid assemblies and are  
151 agnostic to the underlying structures being sequenced, however they provide a good baseline for  
152 what is possible, though the final plasmid sequences are contained in a large collection of  
153 chromosome sequences. *plasmidSPAdes* and *PlasmidTron* are dedicated plasmid assemblers, and  
154 *recycler* is post assembly plasmid analysis tool, with each employing a fundamentally different  
155 analysis strategy.

156

157 Each resulting assembly was measured based on the percentage of plasmid assembled, how  
158 fragmented the plasmid was, and the proportion of non-plasmid bases to plasmid bases (signal to  
159 noise ratio). The assemblies are blasted (v.2.6.0) (11) against the expected plasmid sequence, with  
160 an e-value of 0.0001. Blast hits of less than 200 bases long or less than 90% identity were excluded.  
161 *Recycler* identified no plasmids on the real or simulated data, which appears to be due to the large  
162 complex size of the plasmid.

163

164 Figure 2 shows that as the copy number of the plasmid in the input reads changes, the percentage of  
165 the plasmid recovered changes. *plasmidSPAdes* only begins to start identifying plasmid sequences at  
166 40X, recovering the full plasmid sequence. Below this level the plasmid copy number is too similar to  
167 the chromosome coverage so the algorithm filters it out. The *SPAdes* and *Unicycler* assemblers  
168 identify all of the plasmid sequence with less than 10X coverage, however the plasmid sequences  
169 are fragmented and makes up only ~1.9% of the final assembly as show in Figure 3. *PlasmidTron*  
170 requires slightly more coverage (16X) to generate an assembly which covers the full plasmid  
171 sequence. At 16X more than 90% of the resulting assembly contains plasmid sequences, increasing  
172 to 100% at 40X.

173

## 174 RECOVERY OF TYPING SEQUENCE

175 A real dataset of 114 isolates of *S. Weltevreden*, was sequencing using Illumina as described in (12).  
176 The samples are clonal, with most sharing a similar plasmid, although the payload of the plasmid  
177 itself varies greatly. To get a baseline for what plasmids are present in the input dataset, all of the  
178 samples were compared to the PlasmidFinder (13) database (retrieved 2017-07-25) using Ariba  
179 (v2.10.0) (14), providing the Incompatibility group. PlasmidFinder identified one plasmid group,  
180 IncFII<sub>5</sub>, as present in 89.5% of samples. *plasmidSPAdes*, *Unicycler*, *SPAdes*, *Recycler* and *PlasmidTron*  
181 were provided with the dataset and the results were searched for the IncFII<sub>5</sub> sequence using *blastn*,  
182 with full details listed in Supplementary Table 1. In 4 cases PlasmidFinder failed to identify the  
183 sequence, when it was found by 2 or more other applications. *SPAdes* and *Unicycler* identify the  
184 sequence in 88.6% and 87.7% of samples. *plasmidSPAdes* identifies the plasmid sequence in just

185 8.8% of samples. Recycler failed to identify the plasmid sequence in any sample. *PlasmidTron*  
186 identified the plasmid sequence in 87.7% of cases where the chromosome sequence of *S.*  
187 Weltevreden strain VNS10259 was used as the control, giving identical results to *Unicycler*. The  
188 benefit though over *Unicycler* is that the majority of the assembled sequences correspond only to  
189 the plasmid.

190

## 191 **OUTBREAK AMR**

192 *PlasmidTron* was used to analyse an outbreak of 87 *Salmonella enterica* serovar Typhi (*S.* Typhi)  
193 samples with a resistance profile which had not been previously observed in the haplotype (H58,  
194 4.3.1)(15). Further analysis using PlasmidFinder, as previously described, indicated that the antibiotic  
195 resistance may reside on an IncY plasmid, a plasmid type which had not been associated before with  
196 this haplotype. The chromosomes of 6 complete reference genomes for *S.* Typhi were used as the  
197 controls (accessions GCA\_000195995, GCA\_000007545, GCA\_001157245, GCA\_000245535,  
198 GCA\_001302605, GCA\_000385905) for *PlasmidTron*, and 87 Illumina sequenced outbreak samples  
199 were used as cases (Supplementary Table 2). For each outbreak sample, *PlasmidTron* identified  
200 similar sequences, split over 4-5 contigs. One contig carried the IncY sequence and a second carried  
201 AMR genes. Subsequent resequencing of 1 sample (ERS1670682) using long read technology (Oxford  
202 Nanopore MinION), revealed that these 4 sequences comprised a single plasmid (accession number  
203 GCA\_900185485.1), which was identical in all of the outbreak strains. The sequences generated by  
204 *PlasmidTron* recovered an average of 96% of the plasmid sequence. The fragmentation (mean 4.6) of  
205 the plasmid in the Illumina sequenced samples was due to repeats which could not be resolved with  
206 short read sequencing. Overall 65% of the sequences in the resulting assemblies were part of the  
207 plasmid sequence, with the remainder resulting from a phage recombination in the main  
208 chromosome. This indicates the power of *PlasmidTron* to rapidly, accurately and cost effectively  
209 extract sequences of clinical importance from short reads alone.

210

211

---

## 212 **CONCLUSION**

213 We can utilise the wealth of phenotypic data usually generated for bacterial population studies, be it  
214 routine diagnostics, surveillance or outbreak investigation, to reconstruct plasmids responsible for a  
215 particular phenotype. Rather than just identifying that an AMR or virulence gene exists in a sample,  
216 *PlasmidTron* can reconstruct all of the sequences of the plasmid it is carried on, providing more  
217 insight into the underlying mechanisms. We demonstrated with simulated and real sequences that  
218 *PlasmidTron* more accurately reconstructs large plasmids compared to other methods. We present  
219 the results of a real outbreak of *S.* Typhi where *PlasmidTron* was used to identify the plasmid  
220 sequence carrying a novel AMR resistance profile, not previously described in *S.* Typhi H58/4.3.1,  
221 and validated the results using long read sequencing. Whilst plasmid assembly remains difficult with  
222 short reads, *PlasmidTron* allows for phenotypic data to be utilised to greatly reduce the complexity  
223 of the challenge.

224

---

## 225 **AUTHOR STATEMENTS**

226 This work was supported by the Wellcome Trust (grant WT 098051). Thanks to Martin Hunt, Kathryn  
227 Holt and Ryan Wick for their helpful discussions and assistance with this work. Thanks also to Daryl  
228 Domman for naming the software.

229

230

---

## 231 **ABBREVIATIONS**

232 MGE: mobile genetic element

233 WGS: whole genome sequencing

234 AMR: anti-microbial resistance

235

236

---

## 237 **REFERENCES**

238

- 239 1. Arredondo-Alonso S, Schaik W van, Willems RJ, Schurch AC. On the (im)possibility of  
240 reconstructing plasmids from whole-genome short-read sequencing data. *Microb Genomics*.  
241 2017 Aug 18;
- 242 2. Antipov D, Hartwick N, Shen M, Raiko M, Lapidus A, Pevzner PA. plasmidSPAdes: assembling  
243 plasmids from whole genome sequencing data. *Bioinformatics*. 2016 Nov 15;32(22):3380–7.
- 244 3. Wick RR, Judd LM, Gorrie CL, Holt KE. Unicycler: Resolving bacterial genome assemblies from  
245 short and long sequencing reads. *PLOS Comput Biol*. 2017 Jun 8;13(6):e1005595.
- 246 4. Bankevich A, Nurk S, Antipov D, Gurevich AA, Dvorkin M, Kulikov AS, et al. SPAdes: A New  
247 Genome Assembly Algorithm and Its Applications to Single-Cell Sequencing. Vol. 19. 2012. 455–  
248 477 p.
- 249 5. Rozov R, Brown Kav A, Bogumil D, Shterzer N, Halperin E, Mizrahi I, et al. Recycler: an algorithm  
250 for detecting plasmids from de novo assembly graphs. *Bioinformatics*. 2017 Feb 15;33(4):475–  
251 82.
- 252 6. Deorowicz S, Kokot M, Grabowski S, Debudaj-Grabysz A. KMC 2: fast and resource-frugal k-mer  
253 counting. *Bioinformatics*. 2015 May 15;31(10):1569–76.

- 254 7. Kokot M, Długosz M, Deorowicz S. KMC 3: counting and manipulating k-mer statistics.  
255 Bioinformatics. 2017 Sep 1;33(17):2759–61.
- 256 8. Tange O. GNU Parallel - The Command-Line Power Tool. Login USENIX Mag. 2011 Feb;36(1):42–  
257 47.
- 258 9. Li H. Aligning sequence reads, clone sequences and assembly contigs with BWA-MEM.  
259 ArXiv13033997 Q-Bio [Internet]. 2013 Mar 16 [cited 2017 Jul 26]; Available from:  
260 <http://arxiv.org/abs/1303.3997>
- 261 10. Li H, Handsaker B, Wysoker A, Fennell T, Ruan J, Homer N, et al. The Sequence Alignment/Map  
262 format and SAMtools. Bioinformatics. 2009;25(16):2078–2079.
- 263 11. Camacho C, Coulouris G, Avagyan V, Ma N, Papadopoulos J, Bealer K, et al. BLAST+: architecture  
264 and applications. BMC Bioinformatics. 2009;10:421.
- 265 12. Makendi C, Page AJ, Wren BW, Le Thi Phuong T, Clare S, Hale C, et al. A Phylogenetic and  
266 Phenotypic Analysis of *Salmonella enterica* Serovar Weltevreden, an Emerging Agent of  
267 Diarrheal Disease in Tropical Regions. PLoS Negl Trop Dis. 2016 Feb;10(2):e0004446.
- 268 13. Carattoli A, Zankari E, Garcia-Fernandez A, Larsen MV, Lund O, Villa L, et al. In Silico detection  
269 and typing of plasmids using plasmidfinder and plasmid multilocus sequence typing. Antimicrob  
270 Agents Chemother. 2014;58(7):3895–3903.
- 271 14. Hunt M, Mather AE, Sánchez-Busó L, Page AJ, Parkhill J, Keane JA, et al. ARIBA: rapid  
272 antimicrobial resistance genotyping directly from sequencing reads. Microb Genomics. 2017 Sep  
273 4;
- 274 15. Wong VK, Baker S, Connor TR, Pickard D, Page AJ, Dave J, et al. An extended genotyping  
275 framework for *Salmonella enterica* serovar Typhi, the cause of human typhoid. Nat Commun.  
276 2016 Oct;7:12827.

277

278

---

## 279 DATA BIBLIOGRAPHY

280 Parkhill J et al, *Salmonella enterica subsp. enterica* serovar Typhi str. CT18, 2001, EMBL accession  
281 number GCA\_000195995.

282

283 Deng W et al, *Salmonella enterica subsp. enterica* serovar Typhi str. Ty2, 2006, EMBL accession  
284 number GCA\_000007545.

285



286 Ong SY, *Salmonella enterica subsp. enterica* serovar Typhi str. P-stx-12, 2012, EMBL accession  
287 number GCA\_000245535.

288

289 Xu D et al, *Salmonella enterica subsp. enterica* serovar Typhi str. Ty21a, 2013, EMBL accession  
290 number GCA\_000385905.

291

292 Muhamad Harish S et al, *Salmonella enterica subsp. enterica* serovar Typhi str. PM016/13, 2015,  
293 EMBL accession number GCA\_001302605.

294

295 Page AJ, *Salmonella enterica* serovar Weltevreden str. VNS10259, 2016, EMBL accession number  
296 GCA\_001409135.

297

298 Page AJ, *Salmonella enterica* serovar Typhi str. BL60006, 2017, EMBL accession number  
299 GCA\_900185485.

300

301 Page AJ, *Salmonella enterica* serovar Typhi str. ERL12148, 2017, EMBL accession number  
302 GCA\_001157245.

303

304

---

305 **FIGURES AND TABLES**

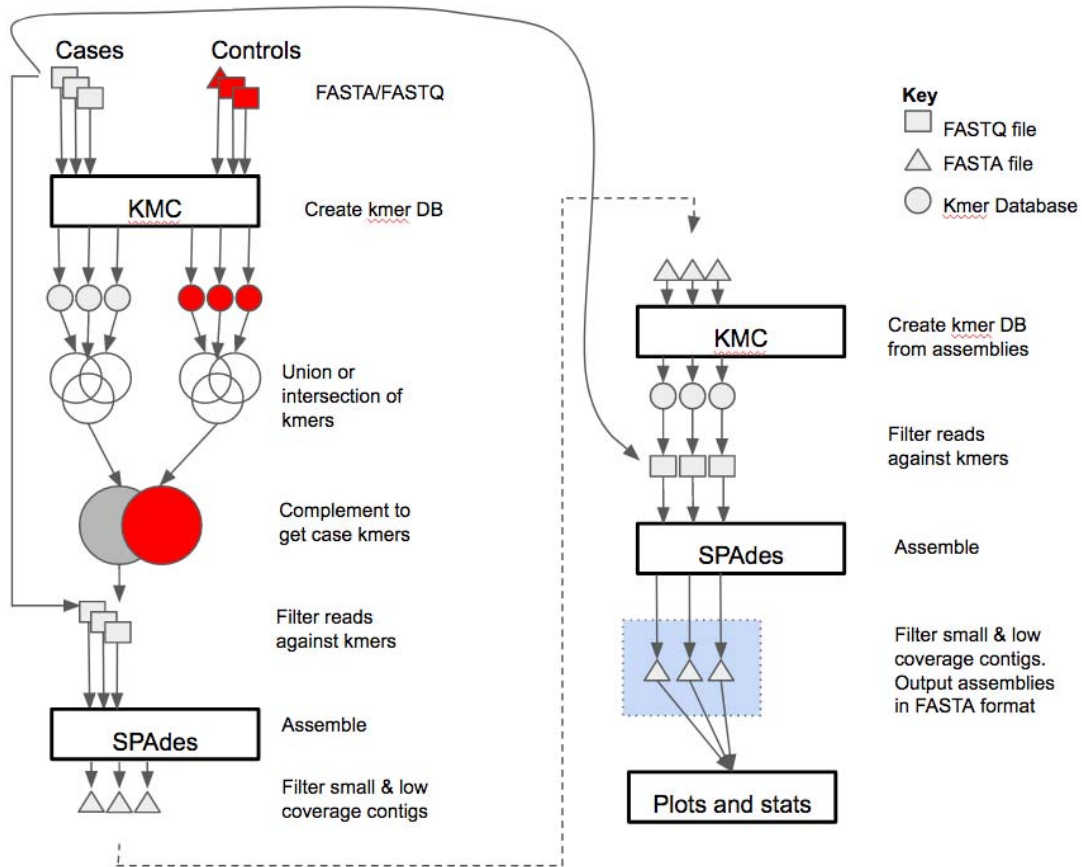

306

307 Figure 1: The PlasmidTron algorithm. FASTQ files are denoted as squares, FASTA files as  
308 triangles and *k*-mer databases as circles.

309

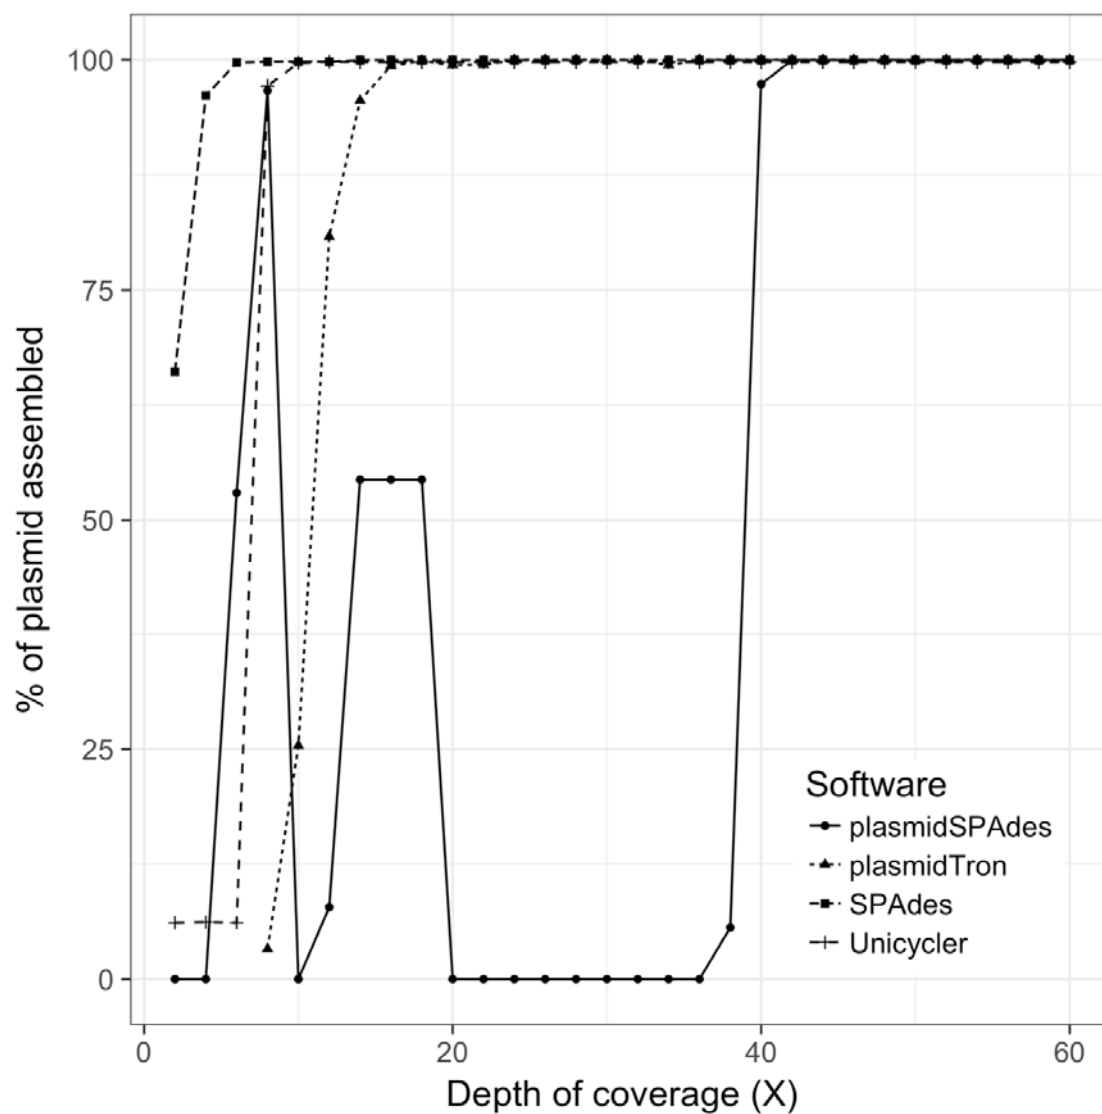

310

311 Figure 2: The percentage of the plasmid sequence which was assembled with different  
312 software applications as the depth of coverage of a plasmid increases in the raw data.

313

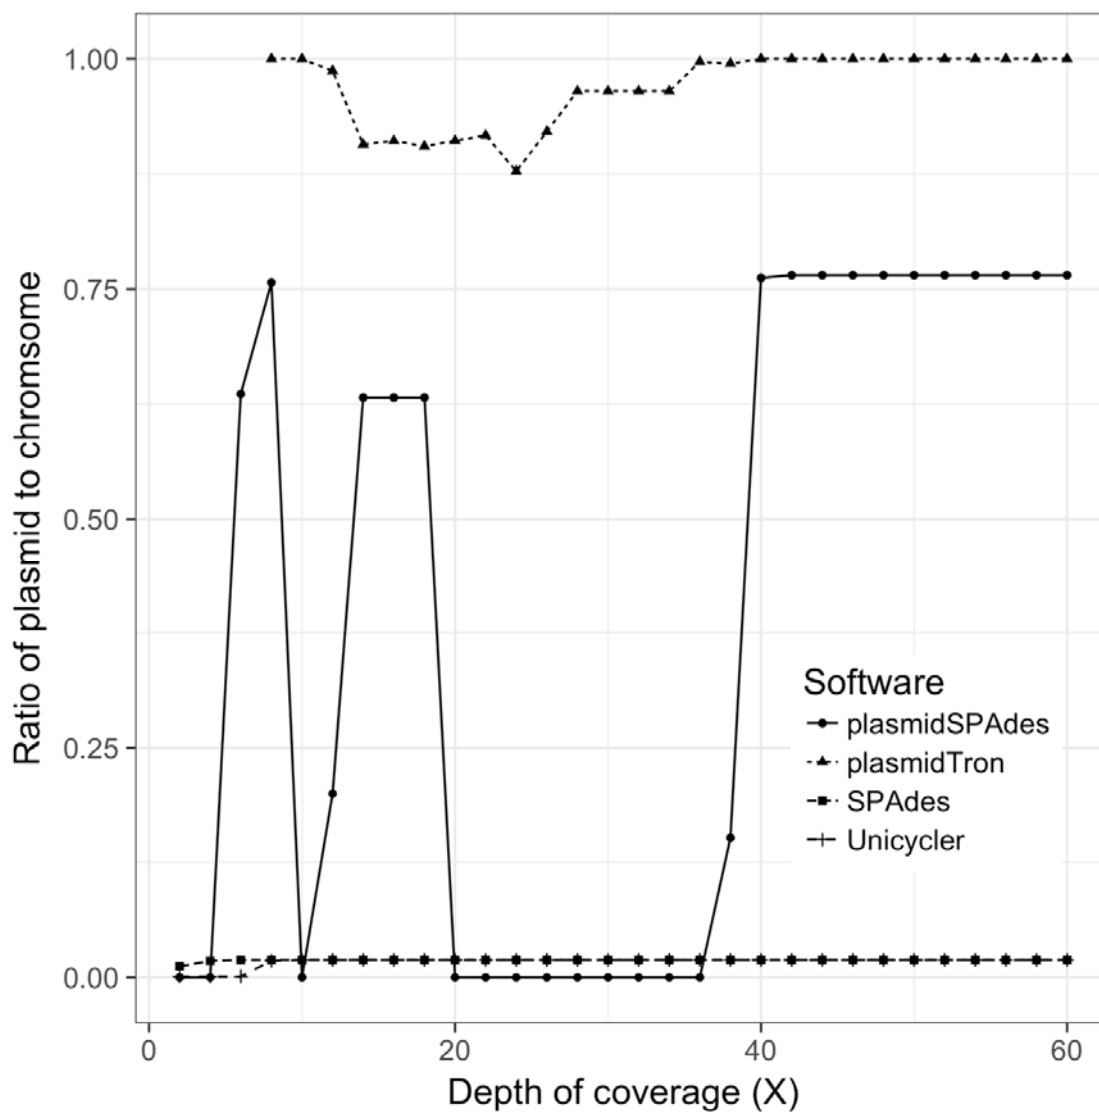

314

315 Figure 3: The ratio of the plasmid sequence to the chromosome sequence in the final  
316 assembly produced by each software application as the depth of coverage of the plasmid  
317 increases in the raw reads. This is akin to the signal to noise ratio.

318
